# Supplementary material for: Selective hydrogenolysis of furfural to 1,2-pentanediol over a Pt–Fe/MT catalyst under mild conditions
Source: Royal Society of Chemistry journal article supplement (doi:10.1039/d4gc00642a), 2024-01-01
Supplement: d4gc00642a1.pdf [file d4gc00642a1.pdf]

# Selective hydrogenolysis of furfural to 1,2-pentanediol over Pt-Fe/MT catalyst under mild conditions

Chen Cao, †<sup>a,b</sup> Weixiang Guan, †<sup>a</sup> Qiaoyun Liu,<sup>c</sup> Lin Li,<sup>a</sup> Yang Su,<sup>a</sup> Fei Liu,<sup>\*a</sup> Aiqin Wang<sup>\*a</sup>

and Tao Zhang<sup>\*a</sup>

---

<sup>a</sup>: CAS Key Laboratory of Science and Technology on Applied Catalysis, Dalian Institute of Chemical Physics, Chinese Academy of Sciences,  
Dalian 116023, China. E-mail: [fei.liu@dicp.ac.cn](mailto:fei.liu@dicp.ac.cn); [aqwang@dicp.ac.cn](mailto:aqwang@dicp.ac.cn); [taozhang@dicp.ac.cn](mailto:taozhang@dicp.ac.cn)

---

<sup>b</sup>: University of Chinese Academy of Sciences, Beijing 100049, China.

<sup>c</sup>: College of Chemistry, Zhengzhou University, Zhengzhou, 450001, China.

† These authors contributed equally.

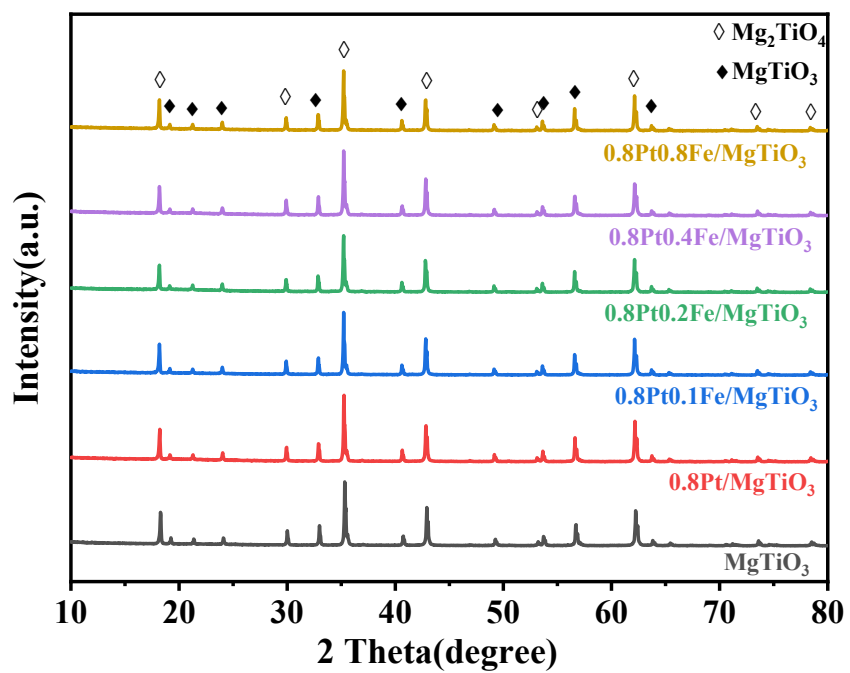

Figure S1 XRD patterns of the series of  $x$  Pt- $y$  Fe/MT catalysts.

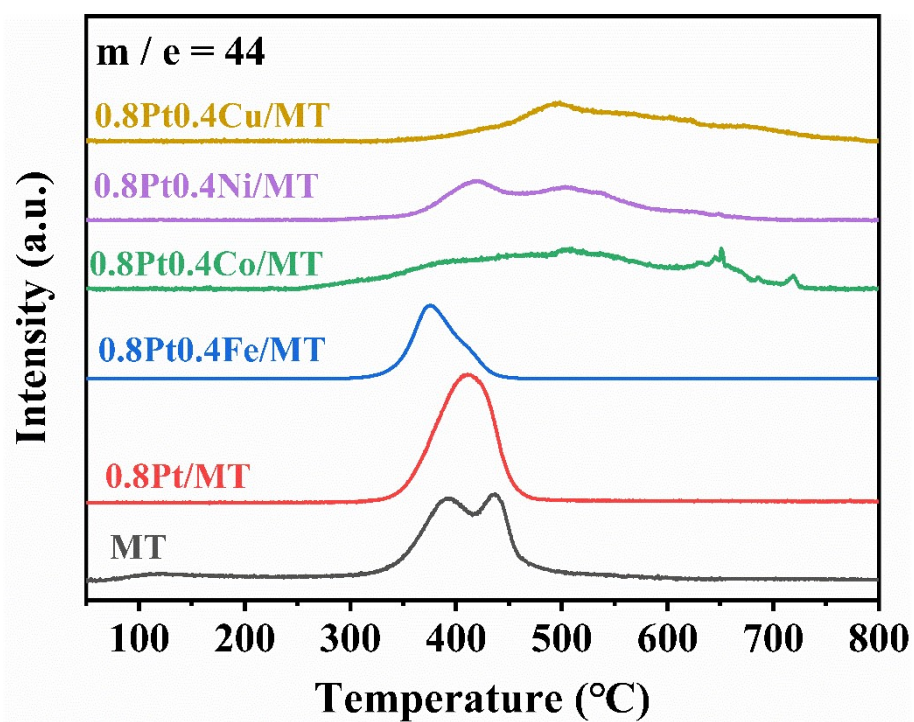

Figure S2 CO<sub>2</sub>-TPD profiles for the MT, 0.8Pt/MT and 0.8Pt-0.4M/MT catalysts.

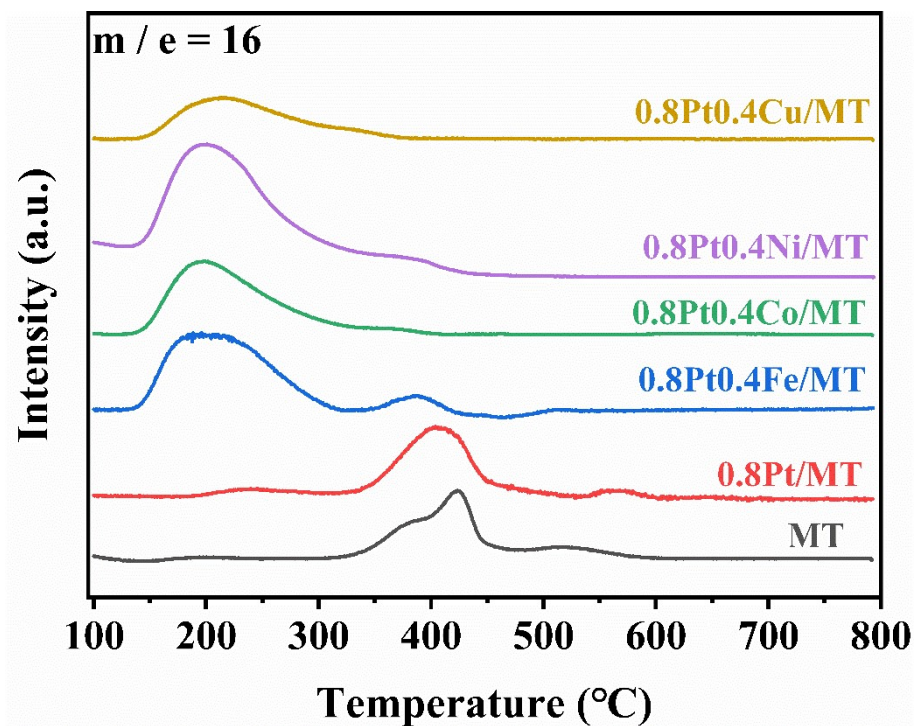

Figure S3 NH<sub>3</sub>-TPD profiles for the MT, 0.8Pt/MT and 0.8Pt-0.4M/MT catalysts.

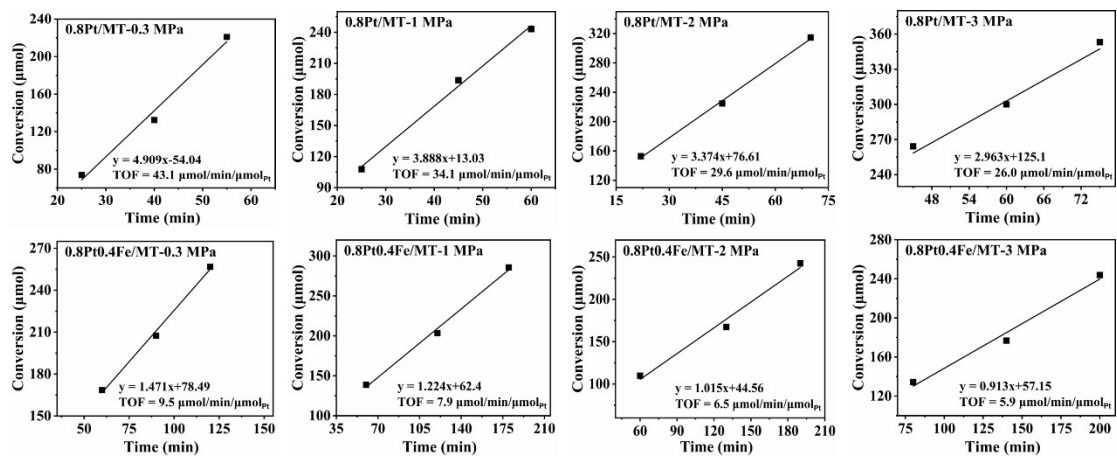

**Figure S4** TOF values under different reaction pressure over 0.8Pt/MT and 0.8Pt0.4Fe/MT catalysts.

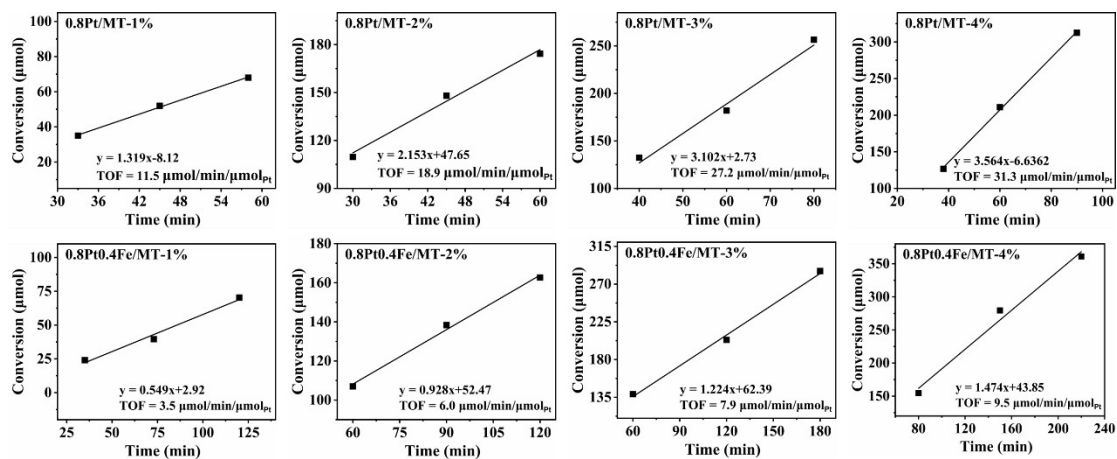

**Figure S5** TOF values under different FFA concentration over 0.8Pt/MT and 0.8Pt0.4Fe/MT catalysts.

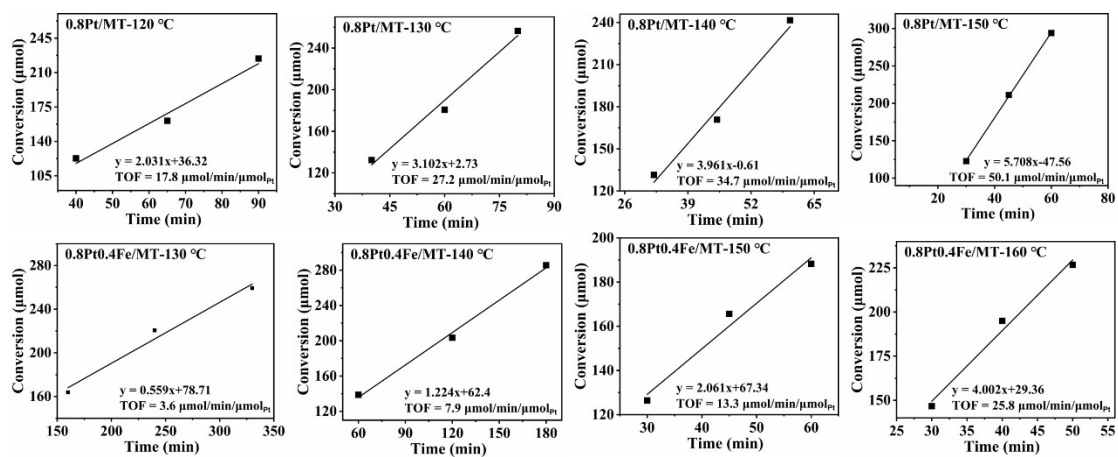

**Figure S6** TOF values under different temperature over 0.8Pt/MT and 0.8Pt0.4Fe/MT catalysts.

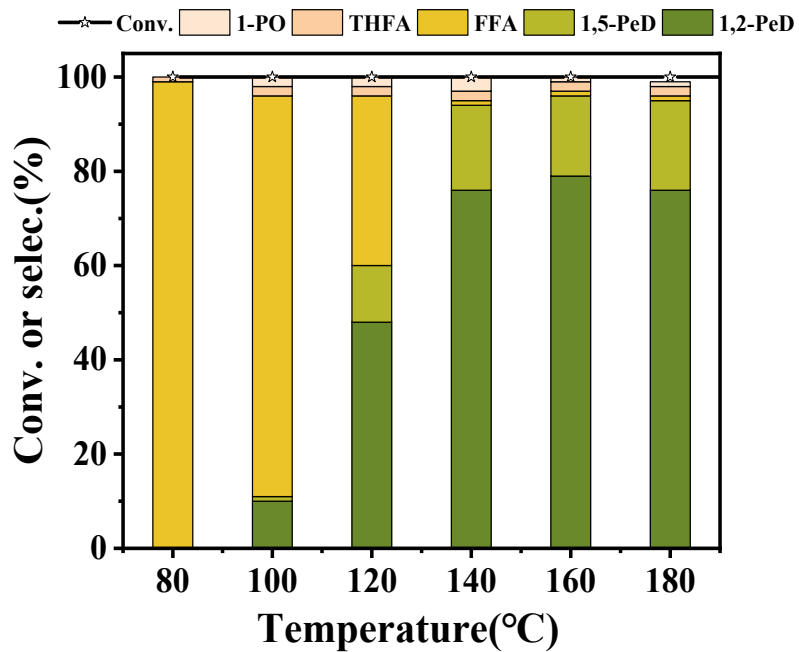

**Figure S7** Catalytic performance under different temperature over 0.8Pt0.4Fe/MT catalyst. Reaction conditions: 0.1 g FA in 5 g water, 100 mg catalyst, 1 MPa H<sub>2</sub>, 10 h.



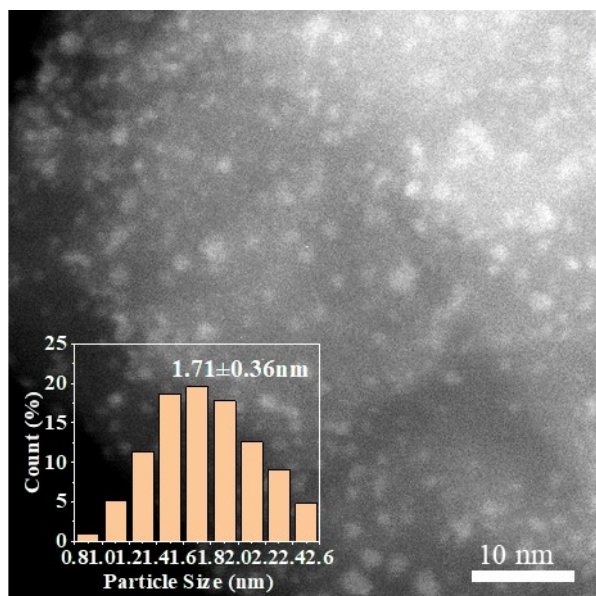

**Figure S8** HAADF-STEM image of the 0.8Pt<sub>0.4</sub>Fe/MT-used catalyst.

**Table S1** The amount of  $\text{Mg}^{2+}$  in the impregnation solution.

| Catalyst | Concentration of $\text{Mg}^{2+}$ |
|----------|-----------------------------------|
| 0.8Pt/MT | 247.5 mg/L                        |

Add 0.343 g of an aqueous solution of  $\text{H}_2\text{PtCl}_6 \cdot 6\text{H}_2\text{O}$  (Pt: 1.166 wt %) into a beaker, followed by the addition of water to achieve a total mass of 7 g, then introduce 0.5 g of MT. After stirring the mixture of metal precursor and support for 24 hours, it was filtered, and the filtrate was subjected to ICP testing. The leaching content of Mg is 0.3 wt %.

**Table S2** The alkalinity and acidity of 0.8Pt0.4M/MT catalysts.

| Catalysts     | CO <sub>2</sub> uptake <sup>a</sup><br>( $\mu\text{mol}_{\text{CO}_2}/\text{g}_{\text{cat}}$ ) | NH <sub>3</sub> uptake <sup>b</sup><br>( $\mu\text{mol}_{\text{NH}_3}/\text{g}_{\text{cat}}$ ) |
|---------------|------------------------------------------------------------------------------------------------|------------------------------------------------------------------------------------------------|
| 0.8Pt0.4Co/MT | 22.3                                                                                           | 13.2                                                                                           |
| 0.8Pt0.4Ni/MT | 25.8                                                                                           | 19.9                                                                                           |
| 0.8Pt0.4Cu/MT | 18.7                                                                                           | 7.7                                                                                            |

<sup>a</sup> Determined by CO<sub>2</sub>-TPD using a MS signal  $m/e = 44$ .

<sup>b</sup> Determined by NH<sub>3</sub>-TPD using a MS signal  $m/e = 16$

**Table S3** Catalytic performance of the 0.8Pt0.4Fe/MT catalyst for the THFA hydrogenolysis.

| Entry | Conversion (%) | Selectivity (%) |         |
|-------|----------------|-----------------|---------|
|       |                | 1,2-PeD         | 1,5-PeD |
| 1     | 0              | 0               | 0       |

Reaction conditions: 0.1 g THFA in 5 mL H<sub>2</sub>O, 100 mg catalyst, 1 MPa H<sub>2</sub> and 140 °C for 10 h.

**Table S4** Comparison with the literature on the production rate of 1,2-PeD by hydrogenolysis of FA or FFA over noble metal catalyst.

| Sub.    | Cat.                                                  | T (°C) | P (MPa) | Time (h)                | Sel. /% |         |         | Production rate (mol <sub>1,2-PeD</sub> / (h* <sup>mol</sup> <sub>noble metal</sub> )) | Ref                  |
|---------|-------------------------------------------------------|--------|---------|-------------------------|---------|---------|---------|----------------------------------------------------------------------------------------|----------------------|
|         |                                                       |        |         |                         | THFA    | 1,2-PeD | 1,5-PeD |                                                                                        |                      |
| FF<br>A | 4Ru/MnOx                                              | 150    | 1.5     | 6                       | 30      | 42.1    | -       | 3.6                                                                                    | 1                    |
| FF<br>A | 10Ru/Al <sub>2</sub> O <sub>3</sub>                   | 200    | 10      | 1                       | 57      | 32      | -       | 20.4                                                                                   | 2                    |
| FA      | 1Ru-5Sn/ZnO                                           | 140    | 3.5     | 6                       | 0       | 84.5    | 12.4    | 168                                                                                    | 3                    |
| FF<br>A | 5Ru/MgO                                               | 190    | 3       | 1                       | 51      | 42      | 2.9     | 144                                                                                    | 4                    |
| FA      | 20Ru/PVP                                              | 125    | 2       | 48                      | 64      | 36      | -       | 1.5                                                                                    | 5                    |
| FA      | 3Pd/MMT-K                                             | 220    | 3.5     | 5                       | 13      | 66      | -       | 47                                                                                     | 6                    |
| FA      | 1Rh/OMS-2                                             | 160    | 3       | 8                       | 0       | 87      | -       | 33                                                                                     | 7                    |
| FA      | 1.9Pt/HT                                              | 150    | 3       | 4                       | 14      | 73      | 8       | 19                                                                                     | 8                    |
| FA      | 5Pt/CeO <sub>2</sub>                                  | 165    | 1.5     | 4                       | 22.8    | 59.9    | 3.1     | 6                                                                                      | 9                    |
| FF<br>A | 4.5%Pt/CeO <sub>2</sub>                               | 165    | 2       | 24                      | 11.7    | 77.1    | 7.3     | 3                                                                                      | 10                   |
| FF<br>A | 1.67Pt/Mg(Al)O@<br>Al <sub>2</sub> O <sub>3</sub> -IR | 200    | 3       | 0.12<br>h <sup>-1</sup> | 6       | 86      | 5       | 12.5                                                                                   | 11                   |
| FA      | 0.8Pt0.4Fe/MT                                         | 140    | 0.1     | 10                      | 2       | 81      | 15      | 53 <sup>a</sup>                                                                        | <b>This<br/>work</b> |
| FA      | 0.2Pt0.1Fe/MT                                         | 140    | 0.1     | 10                      | 6       | 67      | 20      | 128 <sup>a</sup>                                                                       |                      |
| FA      | 0.1Pt0.05Fe/MT                                        | 140    | 0.1     | 10                      | 2       | 43      | 17      | 178 <sup>a</sup>                                                                       |                      |

<sup>a</sup>: These data were obtained after a reaction time of 2 h.

**Table S5** The effect of solvents.<sup>a</sup>

| Entry | Solvent                    | Conversion.<br>(%) | Selectivity (%) |             |     |      |      |
|-------|----------------------------|--------------------|-----------------|-------------|-----|------|------|
|       |                            |                    | 1,2-<br>PeD     | 1,5-<br>PeD | FFA | THFA | 1-PO |
| 1     | Methanol                   | 100                | 0               | 0           | 100 | 0    | 0    |
| 2     | Ethanol                    | 100                | 0               | 0           | 100 | 0    | 0    |
| 3     | N, N-<br>Dimethylformamide | 100                | 0               | 0           | 100 | 0    | 0    |
| 4     | Water                      | 100                | 76              | 18          | 1   | 2    | 3    |

<sup>a</sup>Reaction conditions: 0.1 g of FA in 5 mL H<sub>2</sub>O, 100 mg of 0.8Pt0.4Fe/MT, 1 MPa H<sub>2</sub>, and 140 °C for 10 h.

**Table S6** Catalytic performance of the 0.8Pt/MT and the 0.8Pt0.4Fe/MT catalyst for the furan and its derivatives hydrogenolysis.

| Entry | Substrate        | Catalyst      | Selectivity (%) |           |
|-------|------------------|---------------|-----------------|-----------|
|       |                  |               | Tetrahydrofuran | 1-Butanol |
| 1     | Furan            | 0.8Pt/MT      | 47              | 53        |
| 2     | Furan            | 0.8Pt0.4Fe/MT | 15              | 85        |
| 3     | 2,5-Dihydrofuran | 0.8Pt0.4Fe/MT | 93              | 7         |
| 4     | 2,3-Dihydrofuran | 0.8Pt0.4Fe/MT | 90              | 10        |

Reaction conditions: 0.1 g of substrate in 5 g solvent (3 g H<sub>2</sub>O and 2 g ethanol), 100 mg of catalyst, 1 MPa H<sub>2</sub>, and 140 °C for 10 h.

## References

1. B. Zhang, Y. Zhu, G. Ding, H. Zheng and Y. Li, *Green Chem.*, 2012, **14**, 3402-3409.
2. D. Götz, M. Lucas and P. Claus, *React. Chem. Eng.*, 2016, **1**, 161-164.
3. P. P. Upare, Y. Kim, K.-R. Oh, S. J. Han, S. K. Kim, D.-Y. Hong, M. Lee, P. Manjunathan, D. W. Hwang and Y. K. Hwang, *ACS Sustainable Chem. Eng.*, 2021, **9**, 17242-17253.
4. A. Yamaguchi, Y. Murakami, T. Imura and K. Wakita, *Chemistryopen*, 2021, **10**, 731-736.
5. L. Bruna, M. Cardona-Farreny, V. Colliere, K. Philippot and M. R. Axet, *nanomaterials*, 2022, **12**, 328-338.
6. N. S. Date, R. C. Chikate, H.-S. Roh and C. V. Rode, *Catal. Today*, 2018, **309**, 195-201.
7. D. S. Pisal and G. D. Yadav, *ACS Omega*, 2019, **4**, 1201-1214.
8. T. Mizugaki, T. Yamakawa, Y. Nagatsu, Z. Maeno, T. Mitsudome, K. Jitsukawa and K. Kaneda, *ACS Sustainable Chem. Eng.*, 2014, **2**, 2243-2247.
9. T. Tong, Q. Xia, X. Liu and Y. Wang, *Catal. Commun.*, 2017, **101**, 129-133.
10. T. Tong, X. Liu, Y. Guo, M. Norouzi Banis, Y. Hu and Y. Wang, *J. Catal.*, 2018, **365**, 420-428.
11. Y. Zhu, W. Zhao, J. Zhang, Z. An, X. Ma, Z. Zhang, Y. Jiang, L. Zheng, X. Shu, H. Song, X. Xiang and J. He, *ACS Catal.*, 2020, **10**, 8032-8041.
